# Supplementary material for: A facile mechanochemical route to a covalently bonded graphitic carbon nitride (g-C3N4) and fullerene hybrid toward enhanced visible light photocatalytic hydrogen production
Source: Royal Society of Chemistry journal article supplement (doi:10.1039/c7nr01237c), 2017-01-01
Supplement: c7nr01237c1.pdf [file c7nr01237c1.pdf]

## Electronic Supplemental Information for

### **A Facile Mechanochemical Route to Covalently Bonded Graphitic Carbon Nitride (g-C<sub>3</sub>N<sub>4</sub>) and Fullerene Hybrid toward Enhanced Visible Light Photocatalytic Hydrogen Production**

*Xiang Chen, Huanlin Chen, Jian Guan, Jieming Zhen, Zijun Sun, Pingwu Du, Yalin Lu, and Shangfeng Yang\**

Hefei National Laboratory for Physical Sciences at Microscale, Key Laboratory of Materials for Energy Conversion, Chinese Academy of Sciences, Department of Materials Science and Engineering, Synergetic Innovation Center of Quantum Information & Quantum Physics, University of Science and Technology of China (USTC), Hefei 230026, China

#### **Table of Contents**

- S1. Raman spectra of products obtained from ball-milling a mixture of pristine g-C<sub>3</sub>N<sub>4</sub> and C<sub>60</sub> with and without LiOH catalyst.**
- S2. High-resolution C1s, N1s and O1s XPS spectra.**
- S3. XRD patterns of products obtained from ball-milling a mixture of pristine g-C<sub>3</sub>N<sub>4</sub> and C<sub>60</sub> with and without LiOH catalyst.**
- S4. TGA curves.**
- S5. Schematic illustration of the formation mechanism of the g-C<sub>3</sub>N<sub>4</sub>/C<sub>60</sub> hybrid.**
- S6. FTIR, Raman spectra and XRD patterns of product obtained by reaction of g-C<sub>3</sub>N<sub>4</sub> with C<sub>60</sub> in DMF solution.**
- S7. SEM image of product obtained from ball-milling pure g-C<sub>3</sub>N<sub>4</sub>.**
- S8. TEM elemental mapping images of pristine g-C<sub>3</sub>N<sub>4</sub> and g-C<sub>3</sub>N<sub>4</sub>/C<sub>60</sub> hybrid.**
- S9. Quantum efficiency and action spectra of pristine g-C<sub>3</sub>N<sub>4</sub> and g-C<sub>3</sub>N<sub>4</sub>/C<sub>60</sub> hybrid.**
- S10. Typical time courses of H<sub>2</sub> production based on pristine g-C<sub>3</sub>N<sub>4</sub> and g-C<sub>3</sub>N<sub>4</sub>/C<sub>60</sub> hybrid.**
- S11. Visible light photocatalytic H<sub>2</sub> production rates of different control samples.**
- S12. Diffuse reflectance UV-vis absorption spectra of pristine g-C<sub>3</sub>N<sub>4</sub> and g-C<sub>3</sub>N<sub>4</sub>/C<sub>60</sub> hybrid.**
- S13. BET surface areas of pristine g-C<sub>3</sub>N<sub>4</sub> and g-C<sub>3</sub>N<sub>4</sub>/C<sub>60</sub> hybrid calculated from the nitrogen adsorption-desorption isotherms.**
- S14. Electrical conductivities of pristine g-C<sub>3</sub>N<sub>4</sub> and g-C<sub>3</sub>N<sub>4</sub>/C<sub>60</sub> hybrid.**
- S15. Mott–Schottky plots of pristine g-C<sub>3</sub>N<sub>4</sub> and g-C<sub>3</sub>N<sub>4</sub>/C<sub>60</sub> hybrid.**
- S16. PL spectra of pristine g-C<sub>3</sub>N<sub>4</sub> and g-C<sub>3</sub>N<sub>4</sub>/C<sub>60</sub> hybrid.**

**S1. Raman spectra of products obtained from ball-milling a mixture of pristine  $g\text{-C}_3\text{N}_4$  and  $\text{C}_{60}$  with and without LiOH catalyst.**

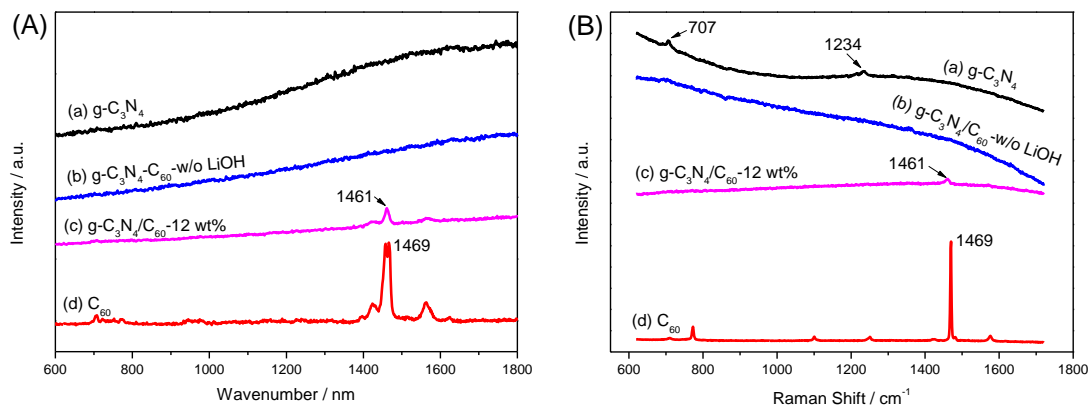

**Figure S1.** Raman spectra of pristine  $g\text{-C}_3\text{N}_4$  (a), products obtained from ball-milling a mixture of pristine  $g\text{-C}_3\text{N}_4$  and  $\text{C}_{60}$  without (b) and with (c) LiOH catalyst, and pristine  $\text{C}_{60}$  (d). The excitation laser light wavelengths are 532 nm (A) and 785 nm (B), respectively.

**S2. High-resolution C1s, N1s and O1s XPS spectra.**

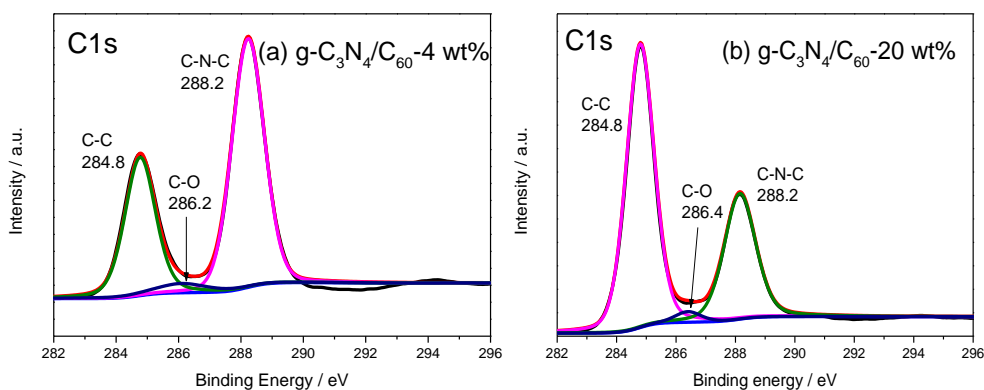

**Figure S2.** High-resolution C1s XPS spectra of  $g\text{-C}_3\text{N}_4/\text{C}_{60}$ -4 wt% (a) and  $g\text{-C}_3\text{N}_4/\text{C}_{60}$ -20 wt% (b).

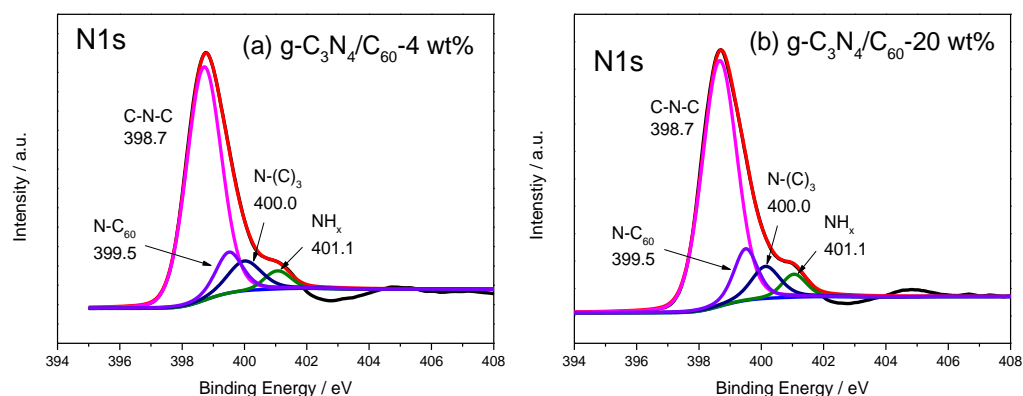

**Figure S3.** High-resolution N1s XPS spectra of g-C<sub>3</sub>N<sub>4</sub>/C<sub>60</sub>-4 wt% (a) and g-C<sub>3</sub>N<sub>4</sub>/C<sub>60</sub>-20 wt% (b).

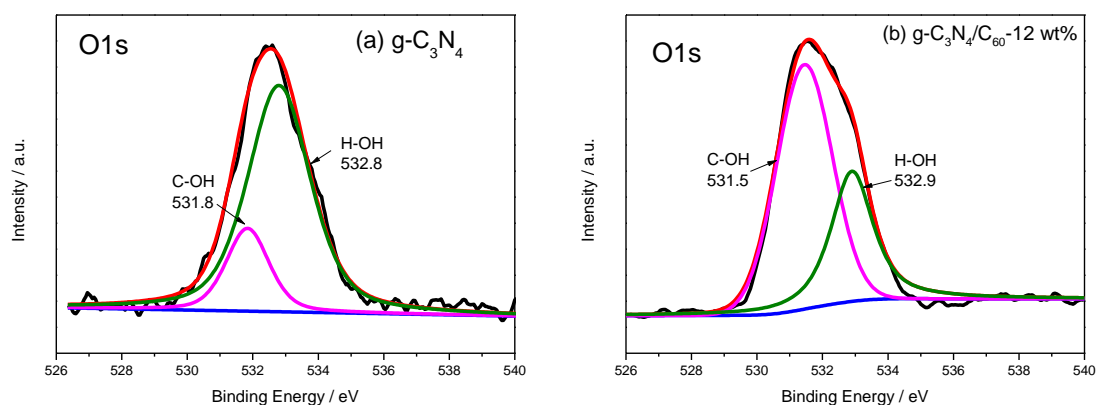

**Figure S4.** High-resolution O1s XPS spectra of pristine g-C<sub>3</sub>N<sub>4</sub> (a) and g-C<sub>3</sub>N<sub>4</sub>/C<sub>60</sub>-12 wt% (b).

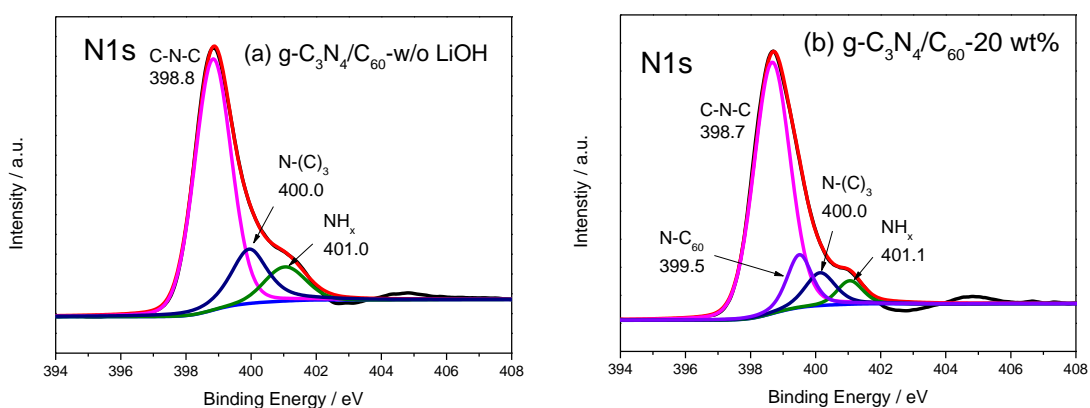

**Figure S5.** High-resolution N1s XPS spectra of products obtained from ball-milling a mixture of pristine g-C<sub>3</sub>N<sub>4</sub> and C<sub>60</sub> without (a) and with (b) LiOH catalyst.

**S3. XRD patterns of products obtained from ball-milling a mixture of pristine g-C<sub>3</sub>N<sub>4</sub> and C<sub>60</sub> with and without LiOH catalyst.**

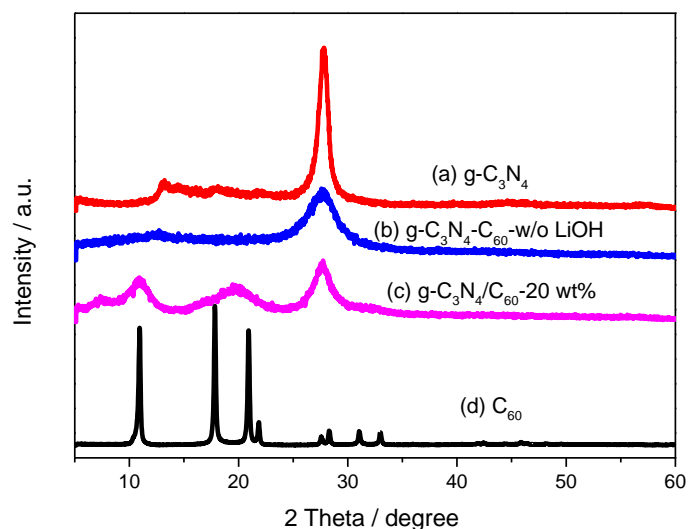

**Figure S6.** XRD patterns of pristine g-C<sub>3</sub>N<sub>4</sub> (a), products obtained from ball-milling a mixture of pristine g-C<sub>3</sub>N<sub>4</sub> and C<sub>60</sub> without (b) and with (c) LiOH catalyst, and pristine C<sub>60</sub> (d).

**S4. TGA curves.**

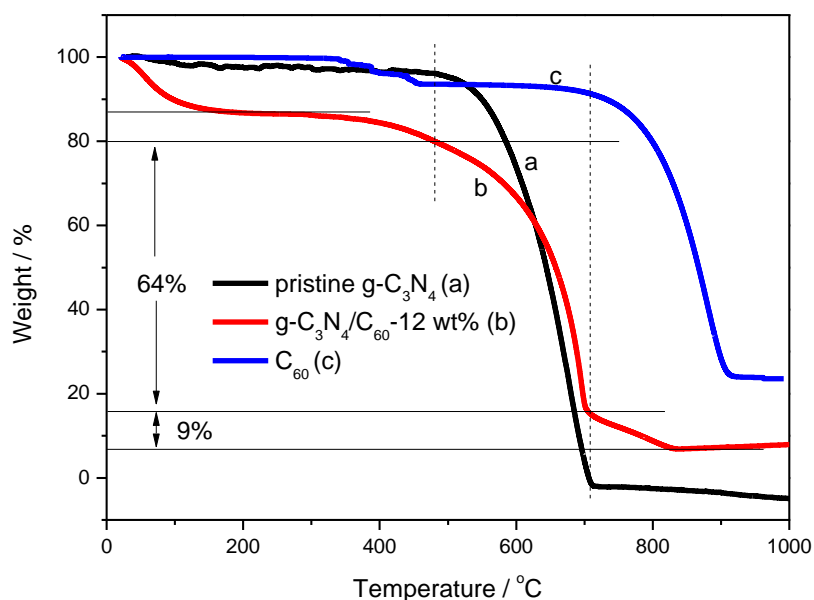

**Figure S7.** TGA curves of pristine g-C<sub>3</sub>N<sub>4</sub> (a), g-C<sub>3</sub>N<sub>4</sub>/C<sub>60</sub>-12 wt% hybrid (b), and C<sub>60</sub> (c). The right dotted vertical line was added to aid identifying the last weight loss step (708 - 830 °C) corresponding to the decomposition of C<sub>60</sub>.

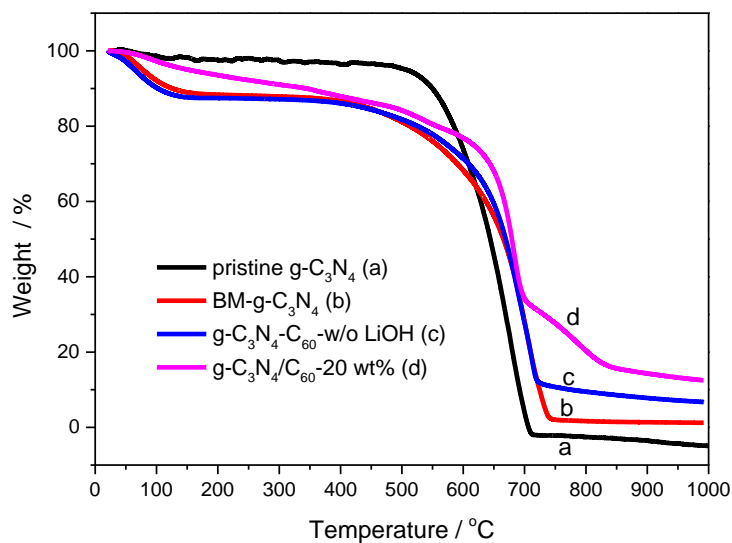

**Figure S8.** TGA curves of pristine  $g\text{-C}_3\text{N}_4$  (a), pure  $g\text{-C}_3\text{N}_4$  after ball-milling (BM- $g\text{-C}_3\text{N}_4$ , b), products obtained from ball-milling a mixture of pristine  $g\text{-C}_3\text{N}_4$  and  $\text{C}_{60}$  without (c) and with (d) LiOH catalyst.

**S5. Schematic illustration of the formation mechanism of the  $g\text{-C}_3\text{N}_4/\text{C}_{60}$  hybrid.**

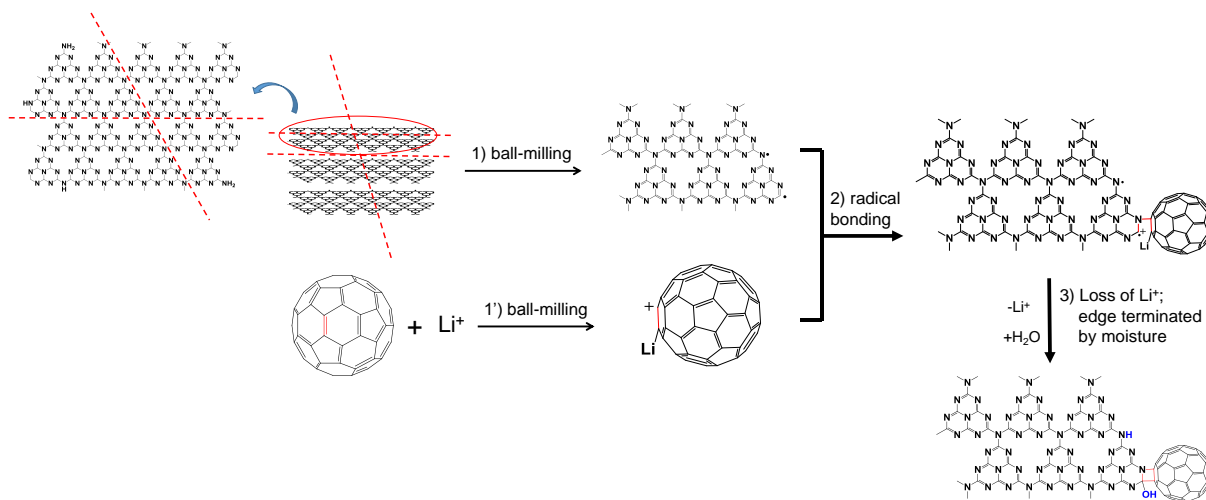

**Scheme S1.** A schematic illustration of the formation mechanism of the  $g\text{-C}_3\text{N}_4/\text{C}_{60}$  hybrid via the mechanochemical ball-milling in the existence of LiOH as catalyst.

**S6. FTIR, Raman spectra and XRD patterns of product obtained by reaction of g-C<sub>3</sub>N<sub>4</sub> with C<sub>60</sub> in DMF solution.**

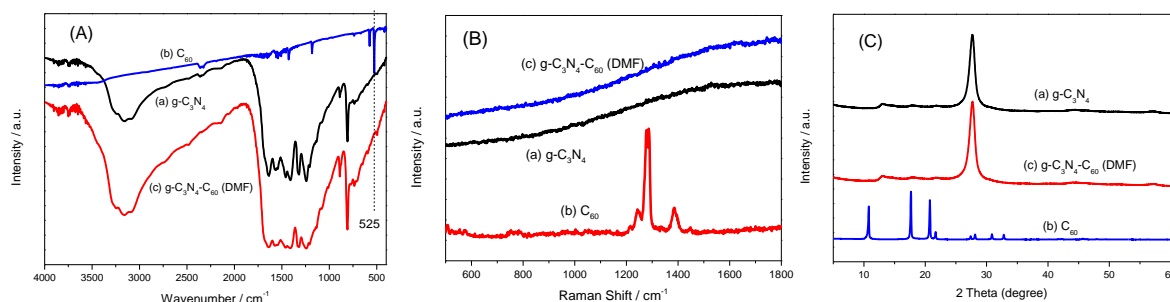

**Figure S9.** FTIR spectra (A), Raman spectra (B) and XRD patterns (C) of pristine g-C<sub>3</sub>N<sub>4</sub> (a), C<sub>60</sub> (b) and product obtained by reaction of g-C<sub>3</sub>N<sub>4</sub> with C<sub>60</sub> in DMF solution (g-C<sub>3</sub>N<sub>4</sub>-C<sub>60</sub>, c).

A mixture of 200 mg pristine g-C<sub>3</sub>N<sub>4</sub> and 200 mg C<sub>60</sub> was dispersed in N,N-dimethylformamide (DMF) solution and stirred for 24 h under 70 °C, followed by Soxhlet-extraction with CS<sub>2</sub> for 48 h to remove the unreacted C<sub>60</sub>. No C<sub>60</sub> moiety was detected in the final product based on FTIR, Raman and XRD characterizations, revealing that the reaction of C<sub>60</sub> with the terminal NH<sub>x</sub> did not occur despite of the high nucleophilicity of the primary amine, and consequently covalent bonding of C<sub>60</sub> with the terminal NH<sub>x</sub> at the edge of pristine g-C<sub>3</sub>N<sub>4</sub> seems unlikely.

**S7. SEM image of product obtained from ball-milling pure g-C<sub>3</sub>N<sub>4</sub>.**

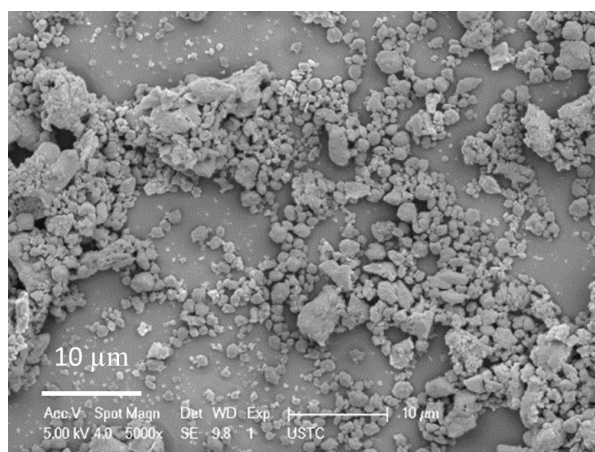

**Figure S10.** SEM image of product obtained from ball-milling of pure g-C<sub>3</sub>N<sub>4</sub>.

**S8. TEM elemental mapping images of g-C<sub>3</sub>N<sub>4</sub> and g-C<sub>3</sub>N<sub>4</sub>/C<sub>60</sub> hybrid.**

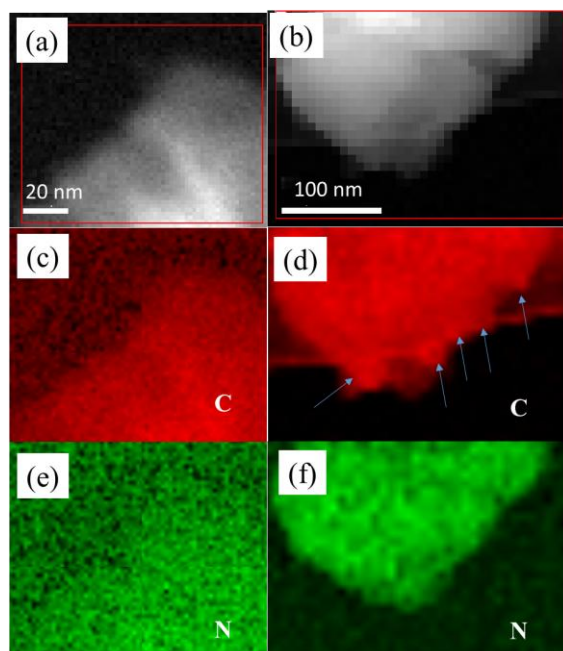

**Figure S11.** TEM elemental mapping images of the portion selected for pristine g-C<sub>3</sub>N<sub>4</sub> (a, c, e) and g-C<sub>3</sub>N<sub>4</sub>/C<sub>60</sub>-12 wt% hybrid (b, d, f). The corresponding C (c, d) and N (e, f) elemental mapping images are also shown.

The C elemental mapping image of g-C<sub>3</sub>N<sub>4</sub>/C<sub>60</sub> hybrid (image d) shows the enrichment of C elements at the edges (marked by arrows), whereas such a phenomenon is not observed for N element in the N elemental mapping image of g-C<sub>3</sub>N<sub>4</sub>/C<sub>60</sub> hybrid (image f). For the case of pristine g-C<sub>3</sub>N<sub>4</sub>, both C and N elements distribute uniformly without obvious enrichment at the edges (images c and e). This provides further experimental evidence on the C<sub>60</sub> bonding to the cleaved edge of g-C<sub>3</sub>N<sub>4</sub>.

### S9. Quantum efficiency and action spectra of pristine g-C<sub>3</sub>N<sub>4</sub> and g-C<sub>3</sub>N<sub>4</sub>/C<sub>60</sub> hybrid.

To measure the quantum yield for visible light H<sub>2</sub> evolution, 50 mg powder sample was dispersed in 100 mL aqueous solution containing 17.5 mg Eosin Y (EY) and 5 mL triethanolamine (TEOA), which was irradiated by a monochromatic light using a bandpass filter ( $\pm 5$  nm) for 420, 450, 475, 520, and 550 nm, respectively. The quantum efficiency ( $\Phi$ ) is calculated according to the following equation (1):

$$\begin{aligned}\Phi &= \frac{\text{number of reacted electrons}}{\text{number of incident photons}} \times 100\% \\ &= \frac{\text{number of evolved H}_2 \text{ molecules} \times 2}{\text{number of incident photons}} \times 100\%\end{aligned}\quad (1)$$

Where the number of incident photons ( $N_{\text{ph}}$ ) can be calculated from the power of the incident light ( $P_{\text{ph}}$ , 0.194, 0.205, 0.202, 0.305 and 0.225 J/s for 420, 450, 475, 520, and 550 nm, respectively), which was calibrated by an irradiatometer (FZ-A, Beijing Normal University Optical Instrument), according to equation (2) (see Figure S12):

$$N_{\text{ph}} = P_{\text{ph}} \times t / (hc/\lambda) = P_{\text{ph}} \times t \times \lambda / (hc) \quad (2)$$

Where  $t$  is the irradiation time,  $\lambda$  is the wavelength of the incident light,  $h$  is planck constant,  $c$  is the speed of light in vacuum.

**Table S1.** Quantum efficiencies ( $\Phi$ ) of different samples with (w) or without (w/o) Pt cocatalyst and EY photosensitizer measured under irradiation with visible light at  $\lambda = 420$  nm.

| sample                                                   | condition    |             | quantum efficiency<br>( $\Phi$ ) |
|----------------------------------------------------------|--------------|-------------|----------------------------------|
|                                                          | Pt (0.3 wt%) | EY (35 wt%) |                                  |
| pristine g-C <sub>3</sub> N <sub>4</sub>                 | w/o          | w           | 0.072%                           |
| g-C <sub>3</sub> N <sub>4</sub> /C <sub>60</sub> -12 wt% | w/o          | w           | 0.20%                            |
| no (control)                                             | w            | w           | 6.95%                            |
| pristine g-C <sub>3</sub> N <sub>4</sub>                 | w            | w           | 6.79%                            |
| g-C <sub>3</sub> N <sub>4</sub> /C <sub>60</sub> -12 wt% | w            | w           | 6.97%                            |
| pristine g-C <sub>3</sub> N <sub>4</sub>                 | w            | w/o         | 0.037%                           |
| g-C <sub>3</sub> N <sub>4</sub> /C <sub>60</sub> -12 wt% | w            | w/o         | 0.051%                           |

Without the existence of Pt cocatalyst,  $\Phi$  of g-C<sub>3</sub>N<sub>4</sub>/C<sub>60</sub>-12 wt% hybrid is 0.20% (with the existence of EY photosensitizer), which is about 2.8 times of that for pristine g-C<sub>3</sub>N<sub>4</sub> (0.072%). Such an enhancement ratio is consistent with that measured for H<sub>2</sub> production rate (about 4.0 times), confirming that covalently bonding of C<sub>60</sub> onto g-C<sub>3</sub>N<sub>4</sub> can indeed result in enhanced visible light photocatalytic H<sub>2</sub> production.



We also measured and compared the quantum efficiencies ( $\Phi$ ) of g-C<sub>3</sub>N<sub>4</sub>/C<sub>60</sub>-12 wt% hybrid and pristine g-C<sub>3</sub>N<sub>4</sub> under different conditions with the existence of Pt cocatalyst (measured under irradiation with visible light at  $\lambda = 420$  nm). Surprisingly, with the co-existence of both Pt cocatalyst and EY photosensitizer, the measured  $\Phi$  of g-C<sub>3</sub>N<sub>4</sub>/C<sub>60</sub>-12 wt% hybrid and pristine g-C<sub>3</sub>N<sub>4</sub> (6.97% and 6.79%, respectively) are quite comparable to that obtained for the control sample (only Pt cocatalyst + EY photosensitizer, 6.95%). This suggests that in this case the visible light H<sub>2</sub> production is primarily contributed by EY. Furthermore, without the existence of EY photosensitizer, the measured  $\Phi$  of g-C<sub>3</sub>N<sub>4</sub>/C<sub>60</sub>-12 wt% hybrid and pristine g-C<sub>3</sub>N<sub>4</sub> (0.051% and 0.037%, respectively) with the existence of Pt cocatalyst only dramatically decrease, and are even lower than that measured without Pt cocatalyst (0.072%). This confirms further the importance of EY photosensitizer which plays the role of sensitizer for extending the spectral response region as discussed already in the main text.

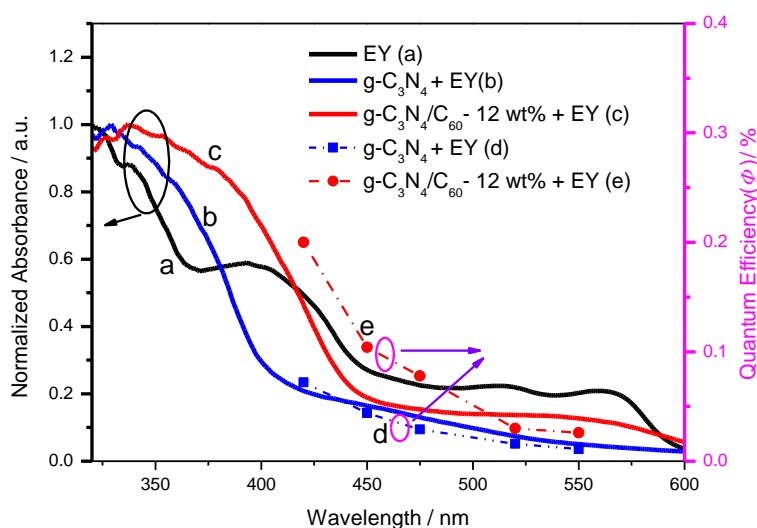

**Figure S12.** UV-VIS diffuse reflectance spectra of EY (a), g-C<sub>3</sub>N<sub>4</sub>+EY (b) and g-C<sub>3</sub>N<sub>4</sub>/C<sub>60</sub>-12 wt%+EY (c), and action spectra for H<sub>2</sub> evolution of g-C<sub>3</sub>N<sub>4</sub>+EY (d) and g-C<sub>3</sub>N<sub>4</sub>/C<sub>60</sub>-12 wt%+EY (e) from an aqueous triethanolamine (TEOA) solution under visible light irradiation of 300 W Xe-lamp using a bandpass filter for 420, 450, 475, 520, and 550 nm, respectively.

**S10. Typical time courses of  $H_2$  production based on pristine  $g-C_3N_4$  and  $g-C_3N_4/C_{60}$ -12 wt% hybrid.**

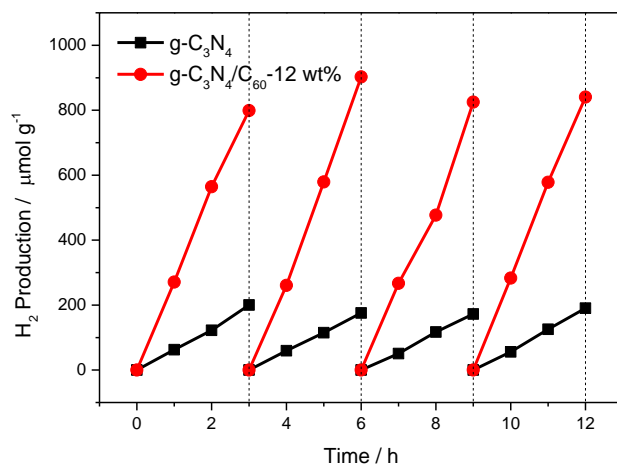

**Figure S13.** Typical time courses of  $H_2$  production based on pristine  $g-C_3N_4$  and  $g-C_3N_4/C_{60}$ -12 wt% hybrid. The measurements were carried out in an aqueous solution (containing TEOA as a hole scavenger and EY as the photosensitizer) evacuated per 3 h without renewing the hole scavenger under visible light ( $\lambda > 420$  nm) irradiation of 300 W Xe-lamp.

**S11. Visible light photocatalytic  $H_2$  production rates of different control samples.**

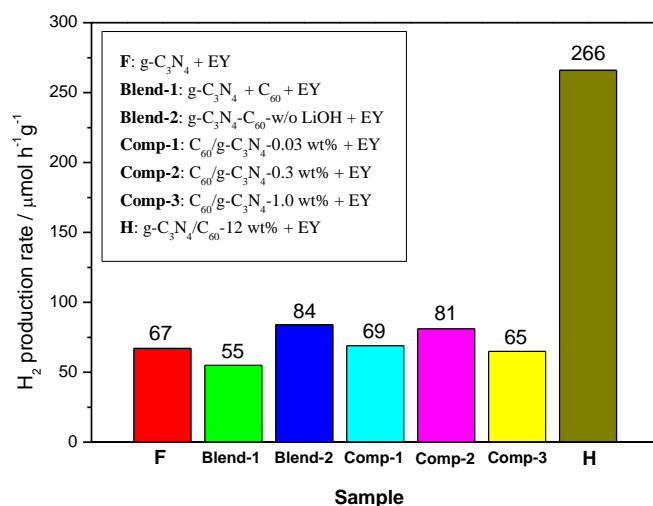

**Figure S14.** Photocatalytic  $H_2$  production rates of different samples measured in 5 vol% TEOA aqueous solution in the presence of EY for 3 h under visible light ( $\lambda > 420$  nm) irradiation of 300 W Xe-lamp. **Blend-1:** a physical blend of  $g-C_3N_4/C_{60}$  (64:9, w/w); **Blend-2:** a mixture of pristine  $g-C_3N_4$  and  $C_{60}$  powders ball-milled without LiOH catalyst ( $g-C_3N_4-C_{60}$ -w/o LiOH). **Comp-1, 2, 3:**  $C_{60}/g-C_3N_4$  composites with different  $C_{60}/\text{dicyandiamide}$  mass ratios (0.03 wt%, 0.3 wt% and 1.0 wt% for **Comp-1, 2, 3**, respectively) using the method reported in ref. [27].

**S12. Diffuse reflectance UV-vis absorption spectra of pristine  $g\text{-C}_3\text{N}_4$  and  $g\text{-C}_3\text{N}_4/\text{C}_{60}$ -12 wt% hybrid.**

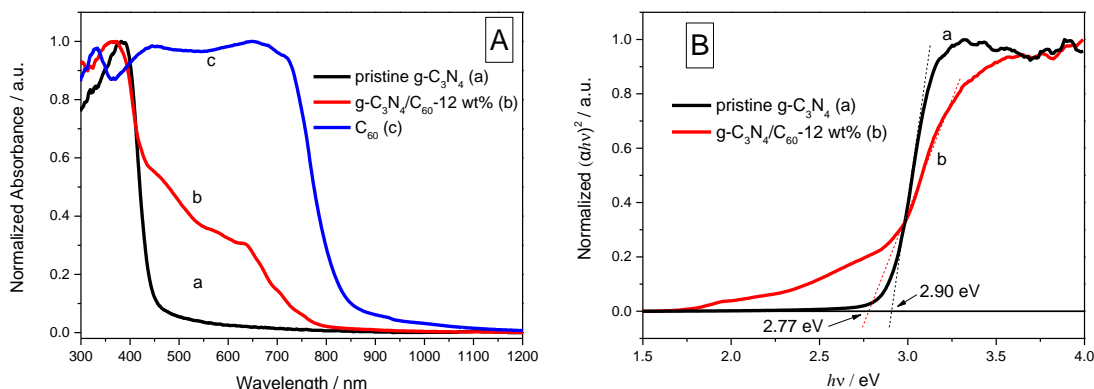

**Figure S15.** Diffuse reflectance UV-vis absorption spectra (A) and  $(\alpha h\nu)^2$  versus  $h\nu$  curves (B) of pristine  $g\text{-C}_3\text{N}_4$  (a) and  $g\text{-C}_3\text{N}_4/\text{C}_{60}$ -12 wt% hybrid (b), and  $\text{C}_{60}$  (c).

**S13. BET surface areas of pristine  $g\text{-C}_3\text{N}_4$  and  $g\text{-C}_3\text{N}_4/\text{C}_{60}$  hybrid calculated from the nitrogen adsorption-desorption isotherms.**

**Table S2.** BET surface areas of pristine  $g\text{-C}_3\text{N}_4$ , BM- $g\text{-C}_3\text{N}_4$ ,  $g\text{-C}_3\text{N}_4/\text{C}_{60}$ -12 wt% and  $g\text{-C}_3\text{N}_4/\text{C}_{60}$  w/o LiOH.

| sample                                           | BET Surface area<br>( $\text{m}^2/\text{g}$ ) |
|--------------------------------------------------|-----------------------------------------------|
| pristine $g\text{-C}_3\text{N}_4$                | 12.5                                          |
| BM- $g\text{-C}_3\text{N}_4$                     | 16.1                                          |
| $g\text{-C}_3\text{N}_4/\text{C}_{60}$ -12 wt%   | 16.6                                          |
| $g\text{-C}_3\text{N}_4\text{-C}_{60}$ -w/o LiOH | 16.9                                          |

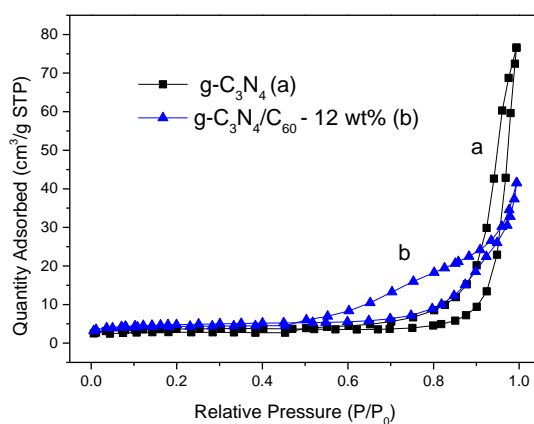

**Figure S16.** Nitrogen adsorption-desorption isotherms of  $g\text{-C}_3\text{N}_4$  (a) and  $g\text{-C}_3\text{N}_4/\text{C}_{60}$  hybrid (b).

**S14. Electrical Conductivities of pristine g-C<sub>3</sub>N<sub>4</sub> and g-C<sub>3</sub>N<sub>4</sub>/C<sub>60</sub> hybrid.**

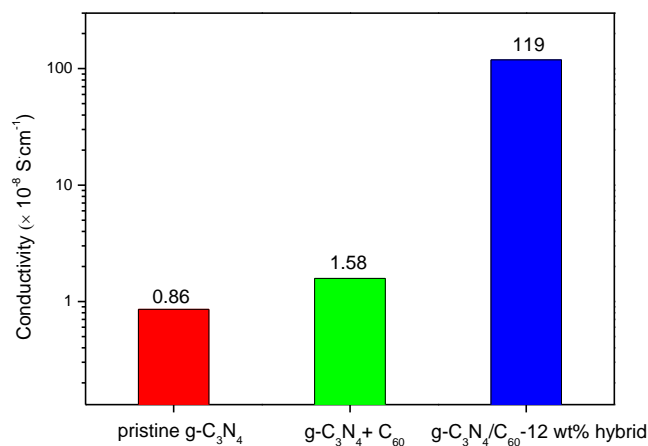

**Figure S17.** Electrical conductivities of the pristine g-C<sub>3</sub>N<sub>4</sub>, g-C<sub>3</sub>N<sub>4</sub>/C<sub>60</sub>-12 wt% and a physical blend of g-C<sub>3</sub>N<sub>4</sub>:C<sub>60</sub> (g-C<sub>3</sub>N<sub>4</sub> + C<sub>60</sub>). Samples were pressed into tablets with the same thickness of approximately 1 mm.

**S15. Mott–Schottky plots of pristine g-C<sub>3</sub>N<sub>4</sub> and g-C<sub>3</sub>N<sub>4</sub>/C<sub>60</sub> hybrid.**

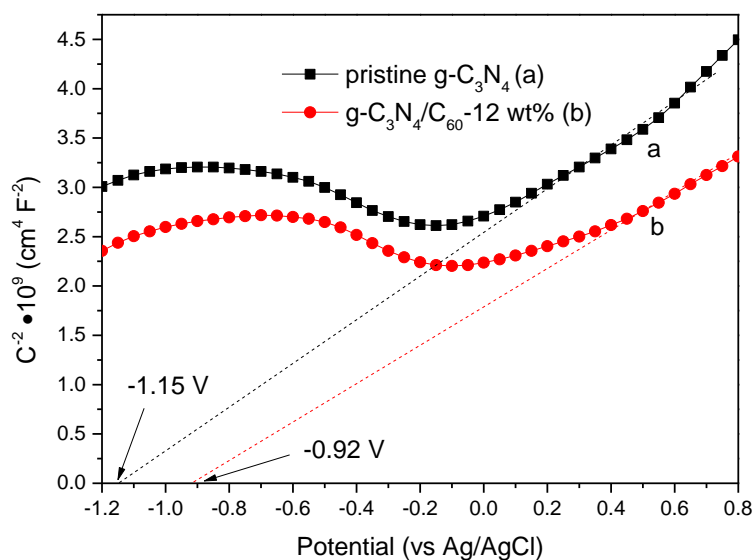

**Figure S18.** Mott-Schottky (MS) plots of pristine g-C<sub>3</sub>N<sub>4</sub> (a) and g-C<sub>3</sub>N<sub>4</sub>/C<sub>60</sub>-12 wt% hybrid (b) film electrodes. The MS plots were obtained in a 0.1 M Na<sub>2</sub>SO<sub>4</sub> aqueous solution at a frequency of 1 kHz. The flat band potentials of g-C<sub>3</sub>N<sub>4</sub> (a) and g-C<sub>3</sub>N<sub>4</sub>/C<sub>60</sub>-12 wt% hybrid (b) are determined to be -1.15 and -0.92 V vs. Ag/AgCl, which correspond to -0.95 and -0.72 V vs. NHE, respectively, according to an equation  $E(\text{NHE}) = E(\text{Ag/AgCl}) + 0.198$ .

**S16. PL spectra of pristine  $g\text{-C}_3\text{N}_4$  and  $g\text{-C}_3\text{N}_4/\text{C}_{60}$  hybrid.**

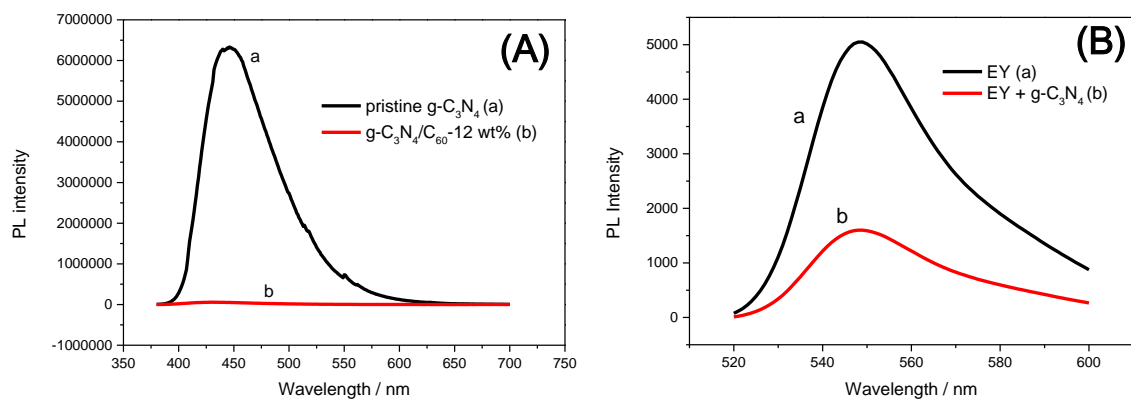

**Figure S19.** (A) PL spectra of pristine  $g\text{-C}_3\text{N}_4$  (a) and  $g\text{-C}_3\text{N}_4/\text{C}_{60}$ -12 wt% hybrid (b) under the excitation wavelength of 360 nm. (B) PL spectra of EY (a) and EY +  $g\text{-C}_3\text{N}_4$  (b) under the excitation wavelength of 520 nm.
